# Supplementary material for: Modeling LTE-advanced cell capacity estimation using packet bundling and carrier aggregation
Source: PeerJ Comput Sci. 2025 May 23;11:e2868. doi: 10.7717/peerj-cs.2868 (PMC12192849; doi:10.7717/peerj-cs.2868)
Supplement: Supplemental Information 1 — Each data point indicates the capacity estimated in the respective radio condition using the proposed algorithm. [file peerj-cs-11-2868-s001.xls]

## Sheet: Excel2LaTeX
RangeAddress	Options	CellWidth	Indent	FileName

## Sheet: All Data
265QAM1265		64QAM1265		16QAM1265		QPSK1265		Total
PRB	PB	PRB	PB	PRB	PB	PRB	PB	PRB	PB
120	594	120	297	120	213	40	76	100	295
300	1488	300	744	300	533	100	192	250	739.25
500	2480	500	1240	500	888	166	320	416.5	1232
1000	4960	1000	2480	1000	1777	333	640	833.25	2464.25
1500	7440	1500	3720	1500	2666	500	960	1250	3696.5
2000	9922	2000	4961	2000	3555	666	1280	1666.5	4929.5
4000	19844	4000	9922	4000	7110	1332	2560	3333	9859
6000	29766	6000	14883	6000	10665	1998	3840	4999.5	14788.5
8000	39688	8000	19844	8000	14220	2664	5120	6666	19718
10000	49610	10000	24805	10000	17775	3330	6400	8332.5	24647.5
265QAM885		64QAM885		16QAM885		QPSK885		Total
PRB	PB	PRB	PB	PRB	PB	PRB	PB	PRB	PB
120	654	120	327	120	213	40	76	100	317.5
300	1638	300	819	300	533	100	192	250	795.5
500	2732	500	1366	500	888	166	320	416.5	1326.5
1000	5464	1000	2732	1000	1777	333	640	833.25	2653.25
1500	8198	1500	4099	1500	2666	500	960	1250	3980.75
2000	10930	2000	5465	2000	3555	666	1280	1666.5	5307.5
4000	21860	4000	10930	4000	7110	1332	2560	3333	10615
6000	32790	6000	16395	6000	10665	1998	3840	4999.5	15922.5
8000	43720	8000	21860	8000	14220	2664	5120	6666	21230
10000	54650	10000	27325	10000	17775	3330	6400	8332.5	26537.5
265QAM660		64QAM660		16QAM660		QPSK660		Total
PRB	PB	PRB	PB	PRB	PB	PRB	PB	PRB	PB
120	654	120	327	120	291	60	106	105	344.5
300	1638	300	819	300	729	150	266	262.5	863
500	2732	500	1366	500	1215	250	444	437.5	1439.25
1000	5464	1000	2732	1000	2431	500	888	875	2878.75
1500	8198	1500	4099	1500	3647	750	1333	1312.5	4319.25
2000	10930	2000	5465	2000	4863	1000	1777	1750	5758.75
4000	21860	4000	10930	4000	9726	2000	3554	3500	11517.5
6000	32790	6000	16395	6000	14589	3000	5331	5250	17276.2
8000	43720	8000	21860	8000	19452	4000	7108	7000	23035
10000	54650	10000	27325	10000	24315	5000	8885	8750	28793.8
